# Supplementary material for: Clinical Outcomes of Different Preoperative Treatment Approaches in Locally Advanced Rectal Cancer: Real-World Experience
Source: Research Square preprint supplement (doi:10.21203/rs.3.rs-6444475/v1), 2025-10-27
Supplement: Supplementary file 1 [file 70a47530592a937cca99a984.docx]

**Supplementary Table 1.** Compliance

|  | Strategy | | | | | | P value |
| --- | --- | --- | --- | --- | --- | --- | --- |
| Conventional nCRT | | TNT | | nCRT-POC | |
| Completed plan (N=337)  Yes  No | 87  67 | 57%  43% | 133  19 | 87%  13% | 21  10 | 68%  32% | <0.001 |

Abbreviations : Conventional N-CRT, Standard (Conventional) concurrent chemoradiation strategy; TNT, total neoadjuvant therapy; CMT, chemotherapy
